# Supplementary material for: Comparing the host behaviour of roof-shaped compounds trans-9,10-dihydro-9,10-ethanoanthracene-11,12-dicarboxylic acid and its dimethyl ester in the presence of mixtures of xylene and ethylbenzene guests
Source: Royal Society of Chemistry journal article supplement (doi:10.1039/d1ce00594d), 2021-01-01
Supplement: d1ce00594d1.pdf [file d1ce00594d1.pdf]

## SUPPLEMENTARY INFORMATION

### Comparing the host behaviour of roof-shaped compounds *trans*-9,10-dihydro-9,10-ethanoanthracene-11,12-dicarboxylic acid and its dimethyl ester in the presence of mixtures of xylene and ethylbenzene guests

Benita Barton\*, Ulrich Senekal and Eric C. Hosten

Department of Chemistry, PO Box 77000, Nelson Mandela University, Port Elizabeth, 6031, South Africa. E-mail: benita.barton@mandela.ac.za

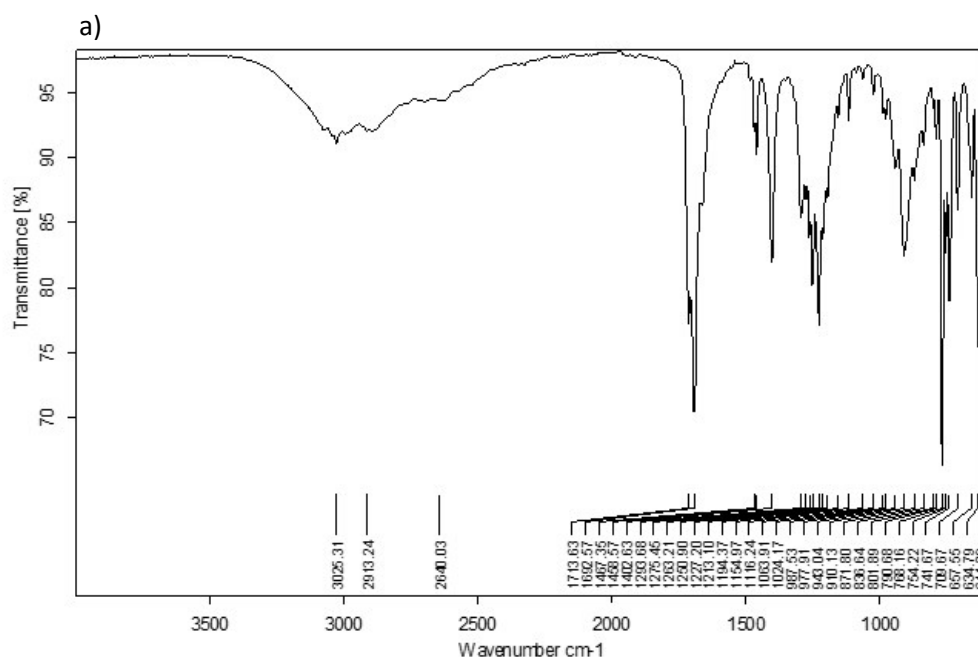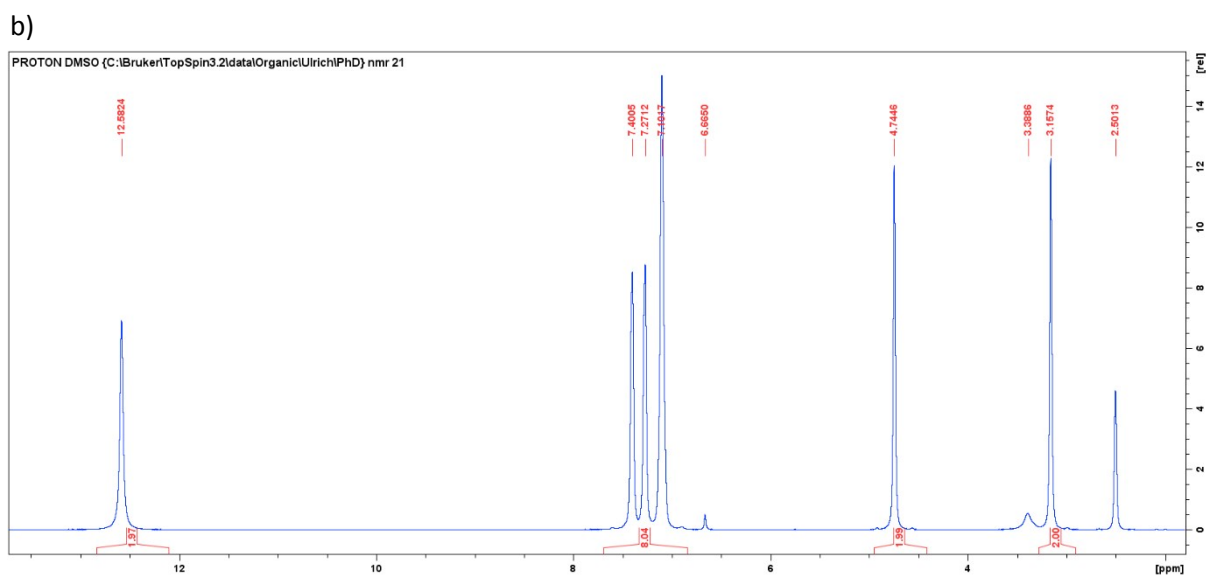

c)

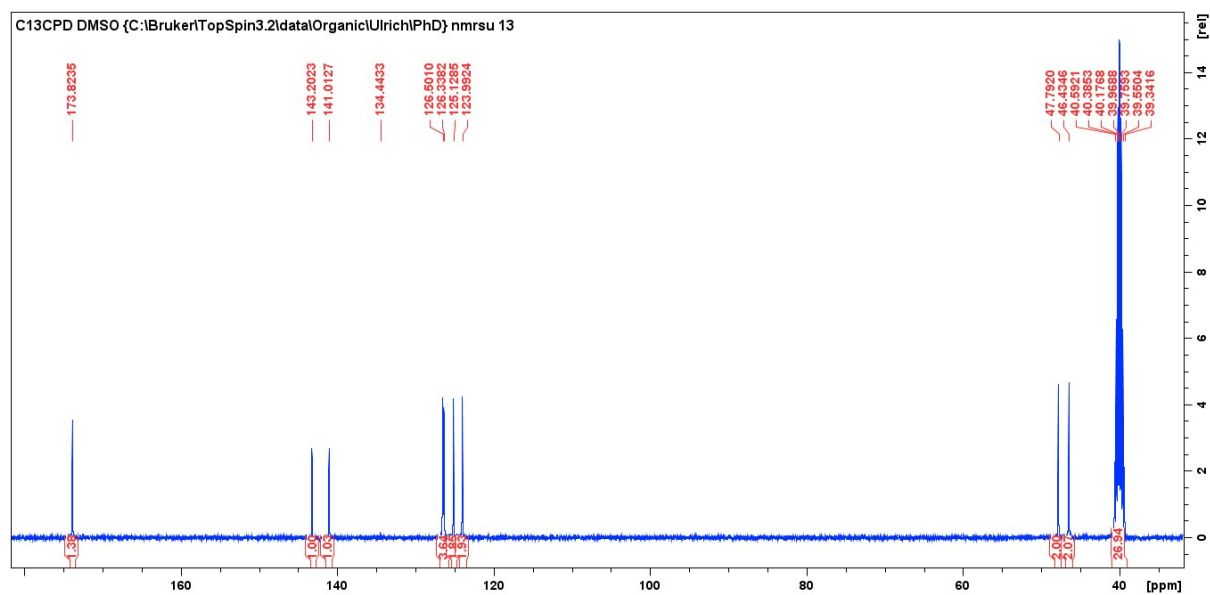

Fig. S1 a) IR, b)  $^1\text{H}$ -NMR and c)  $^{13}\text{C}$ -NMR spectra for the diacid **1**.

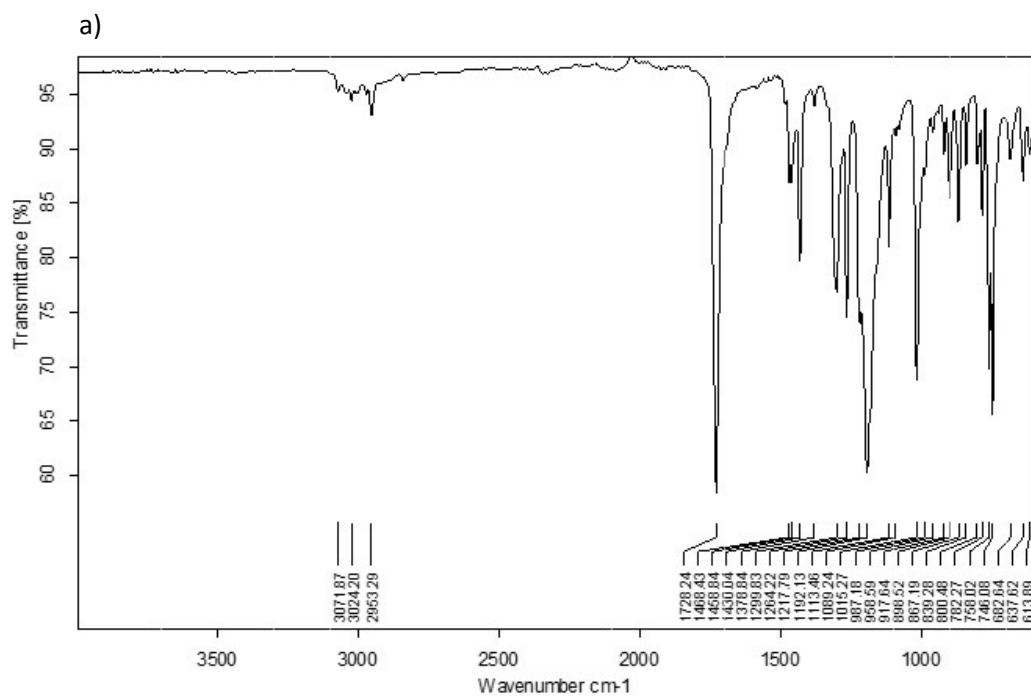

b)

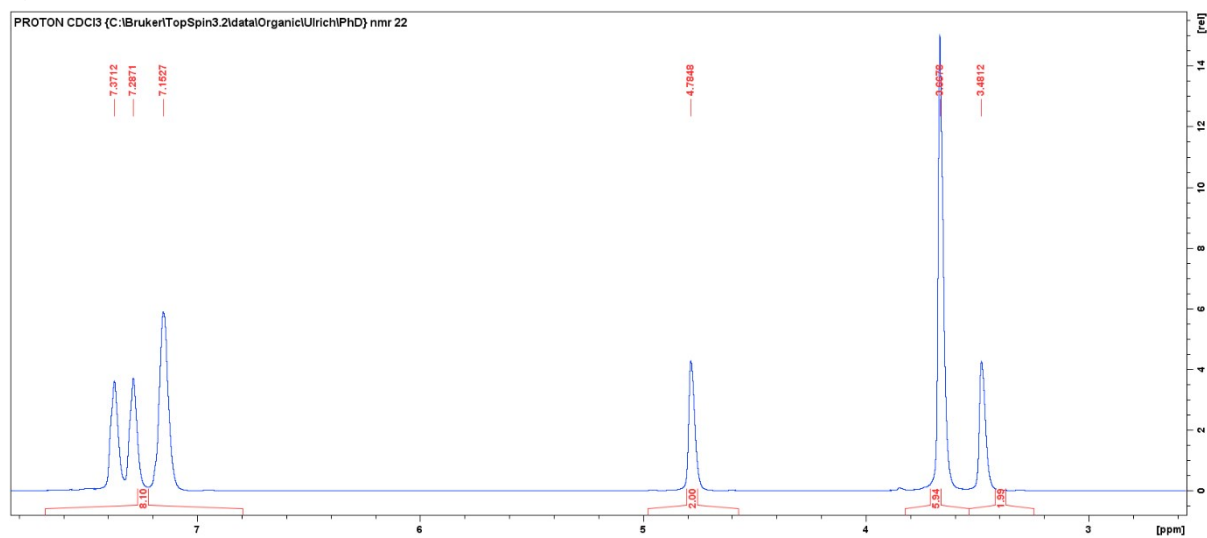

c)

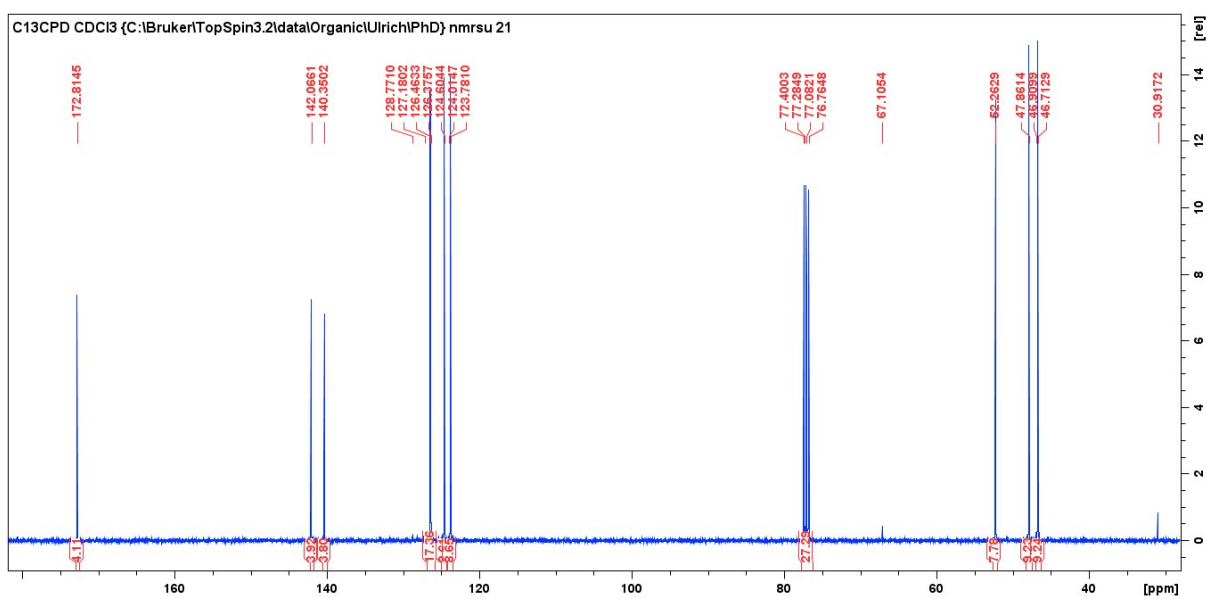

Fig. S2 a) IR, b) <sup>1</sup>H-NMR and c) <sup>13</sup>C-NMR spectra for the diester **4**.
